# Supplementary material
Source: PubMed Central journal article supplement (PMC1560918)
Supplement: plntcell_tpc.106.042812_1.pdf [file plntcell_tpc.106.042812_1.pdf]

**Table 1: PCR primers and PCR product sizes in base pairs together with optimal acquisition temperatures for the genes analysed.**

| <b>Gene</b>    | <b>Forward</b>          | <b>Reverse</b>          | <b>PCR size (bp)</b> | <b>Acquisition Temp. (°C)</b> |
|----------------|-------------------------|-------------------------|----------------------|-------------------------------|
| GAPdH Hv       | GTGAGGCTGGTGCTGATTACG   | TGGTGCAGCTAGCATTTGAGAC  | 198                  | 80                            |
| tubulin Hv     | AGTGTCCCTGTCCACCCACTC   | AGCATGAAGTGGATCCTTGG    | 269                  | 80                            |
| cyclophilin Hv | CCTGTTCGTGTCGTCGGTCTAAA | ACGCAGATCCAGCAGCCTAAAAG | 122                  | 79                            |
| HSP70 Hv       | CGACCAGGGCAACCGCACCAC   | ACGGTGTGTGATGGGGTTCATG  | 108                  | 83                            |
| <i>BclI</i>    | ACTCGGGTGGGTGGCTACATT   | AAGTAGCTTCAAGCAGCAACC   | 261                  | 81                            |
| tubulin Os     | TACCGTGCCCTTACTGTTCC    | CGGTGGAATGTCACAGACAC    | 234                  | 80                            |
| actin Os       | GAAGATCACTGCCTTGCTCC    | CGATAACAGCTCCTCTTGGC    | 249                  | 80                            |
| 18 RNA Os      | ATGATAACTCGACGGATCGC    | CTTGGATGTGGTAGCCGTTT    | 169                  | 81                            |
| GAPdH Os       | GGGCTGCTAGCTTCAACATC    | TTGATTGCAGCCTTGATCTG    | 190                  | 81                            |
| <i>RclI</i>    | GAAGATCATGTGGAGTGGCA    | AATGACTTCAGACTTCGCAGG   | 304                  | 79                            |
