# Supplementary material
Source: PubMed Central journal article supplement (PMC1560918)
Supplement: plntcell_tpc.106.042812_2.pdf [file plntcell_tpc.106.042812_2.pdf]

**Table 1: EST sequences discovered during BLAST and regular expression searches.**

| <b>Putative gene</b> | <b>Representative Genbank accession number</b> | <b>Other Genbank accession numbers</b>                                                                                                                                                                                                                                                                                                                                                                                                                                                                              |
|----------------------|------------------------------------------------|---------------------------------------------------------------------------------------------------------------------------------------------------------------------------------------------------------------------------------------------------------------------------------------------------------------------------------------------------------------------------------------------------------------------------------------------------------------------------------------------------------------------|
| <i>Z. mays</i> A     | CF060985                                       | CF060618, CF062460, CF061101, CF061459, CF061865, CF062290, CF062120, CF061869, BG842908                                                                                                                                                                                                                                                                                                                                                                                                                            |
| <i>Z. mays</i> B     | CF014141                                       | CF014163, CF632864, CF627514                                                                                                                                                                                                                                                                                                                                                                                                                                                                                        |
| <i>Z. mays</i> C     | CK369406                                       | CF628296, CF631473                                                                                                                                                                                                                                                                                                                                                                                                                                                                                                  |
| <i>Z. mays</i> D     | BM379838                                       | BM079688, BQ539290, BM079864, BG842521, BG840295, BM379967, BM073284, BG841107, BQ539511, BM080069, BM078257, BM501286                                                                                                                                                                                                                                                                                                                                                                                              |
| <i>Z. mays</i> E     | CF630454                                       |                                                                                                                                                                                                                                                                                                                                                                                                                                                                                                                     |
| <i>Z. mays</i> F     | CF013901                                       | CK368283, CF629083, CF623412, CF637452, CF626024, CF624112, CF626001, CF624127, CF015619, CF015733, CF625296, CF638288, CF015510, CF015544, CK827767, CK826704, CK826841, CK826611                                                                                                                                                                                                                                                                                                                                  |
| <i>Z. mays</i> G     | CN070702                                       | BI398424, BI644127, BI361085, BI361184, CN071712, BI674566, CF972480, CF627429, BI389440, BI674584, CN070995, BI644150, BI679431, BI180184, CK787253, BI595962, BI478970, BI430833, CN072065                                                                                                                                                                                                                                                                                                                        |
| <i>Z. mays</i> H     | BI674581                                       | CF632633, CK827396, CK369354, CF628247, BI398328, BI543051, BI595687, BI644147, CK368574, CF623793, CF626568, CK348074, CK827235, CF637744, CF625202, CF623307, CF627156, CF627187, CF625936, CF624592, CK347184, CK347517, CF013936, CN071992, BI233547, CN071005, CF623987, BI542770, BI358977                                                                                                                                                                                                                    |
| <i>Z. mays</i> I     | BM080572                                       | CF624643, CF626422, CF629376, CK827521, CK369318, CF628209, CF630770, CK985637, BI644143, BI542521, BI096779, CK347544, BI360921, BI398394, CN070829, BI358760, BI233357, BI423450, CF034267, BM073962, CF061693, CF061072, CF061754, BM382425, BG842109, BG841024, BM074496, BG840377, BG458908, BG518376, BM381108, BG840646, BM381300, BM078609, BM381859, BM379764, BM381184, BM381749, BG354221, BG316672, BQ539273, BM379466, BM382241, BG840875, BG842779, BM499120, BM380284, BM382304, BM379400, BG840475, |

|                          |          |                                                                                                                                                                                                |
|--------------------------|----------|------------------------------------------------------------------------------------------------------------------------------------------------------------------------------------------------|
|                          |          | BM380710, BM078285, BM382286, BM380268,<br>BG841740, BG349359, BG840701, BG265147,<br>BM078233, BG842403, BG458909, BM382371,<br>BE924861, BG355271, BG354220, BI992322,<br>CF033421, BI359180 |
| <i>Z. mays</i> J         | CK368015 |                                                                                                                                                                                                |
| <i>T. aestivum</i> A     | CA617438 | CA620154, CA620998, CA620288, CA620510,<br>CA624516, CA623760, CA623609, CA622147                                                                                                              |
| <i>T. aestivum</i> B     | CK154330 | CK171531, CK170623, CK153096, CA676138,<br>CK170244, CK170757, CK169670, CK169858,<br>CK171962, CK169295, BQ905788, CA637183,<br>CK169285, CA725235                                            |
| <i>T. aestivum</i> C     | CK154890 | CK157458, CK154842, CK155009, BE591233                                                                                                                                                         |
| <i>T. aestivum</i> D     | CA595705 | BJ256329, CA597383, BJ261862, CA596469,<br>BJ264363, BJ258892, CA595009                                                                                                                        |
| <i>T. aestivum</i> E     | BE591233 |                                                                                                                                                                                                |
| <i>H. vulgare</i>        | AL450615 | AJ434865, BQ468207, AL502957, AL499930,<br>BJ467857, BJ463687, CK567773, AL450685,<br>CD054969, BE421283, AL450566, AL505703,<br>BE437452                                                      |
| <i>S. bicolor</i>        | BE125990 | BE125287, BE125094, BE358691, BE358569,<br>AW922386, BE360008                                                                                                                                  |
| <i>S. arundinaceus</i>   | CK803164 |                                                                                                                                                                                                |
| <i>S. officinarum</i>    | CA274667 |                                                                                                                                                                                                |
| <i>P. glaucum</i>        | CD725989 | CD725101                                                                                                                                                                                       |
| <i>H. centranthoides</i> | CB084585 | CB083237, CB083871, CB087639                                                                                                                                                                   |
